# Supplementary material for: Direct ChIP-Seq significance analysis improves target prediction
Source: PubMed Central journal article supplement (PMC4460594; doi:10.1186/1471-2164-16-s5-s4), 2015-05-26
Supplement: 1471-2164-16-S5-S4-S1.pdf [file 1471-2164-16-S5-S4-S1.pdf]

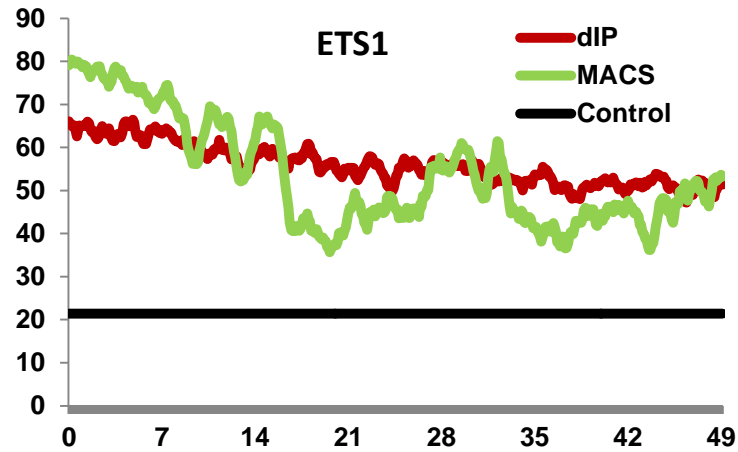

Rank of predicted target regions from ETS1 ChIP-seq according to dIP and MACS (1000s of sites)

## Figure S1
